# Supplementary material
Source: PubMed Central journal article supplement (PMC9246994)
Supplement: NIHMS1801579-supplement-1.pdf [file NIHMS1801579-supplement-1.pdf]

Table 3 (supplement): Prognostic model using wound area and wound duration at first visit parameters

| Wound parameters (area, duration)<br>(sample/percent of total) |                | >2cm <sup>2</sup> , >8wks<br>(89/45.6%) | >2cm <sup>2</sup> , <8wks<br>(18/9.2%) | <2cm <sup>2</sup> , >8wks<br>(63/32.3%) | <2cm <sup>2</sup> , <8wks<br>(25/12.8%) |
|----------------------------------------------------------------|----------------|-----------------------------------------|----------------------------------------|-----------------------------------------|-----------------------------------------|
| Healing rate at 16 weeks                                       | Based on model | 20.3 (18.6,22.0)                        | 30.4 (26.1,34.7)                       | 44.8 (42.1,47.5)                        | 63.1(57.7,68.6)                         |
|                                                                | Actual         | 19.1 (11.5,28.8)                        | 38.9 (17.3,64.2)                       | 41.3 (29.0,54.4)                        | 66.0 (54.9,90.6)                        |
